# Supplementary material for: Response of Various Yb3+-Doped Oxide Glasses to Different Radiation Treatments
Source: MDPI journal article supplement (doi:10.3390/ma15093162), 2022-04-27
Supplement: s1 [file s1]

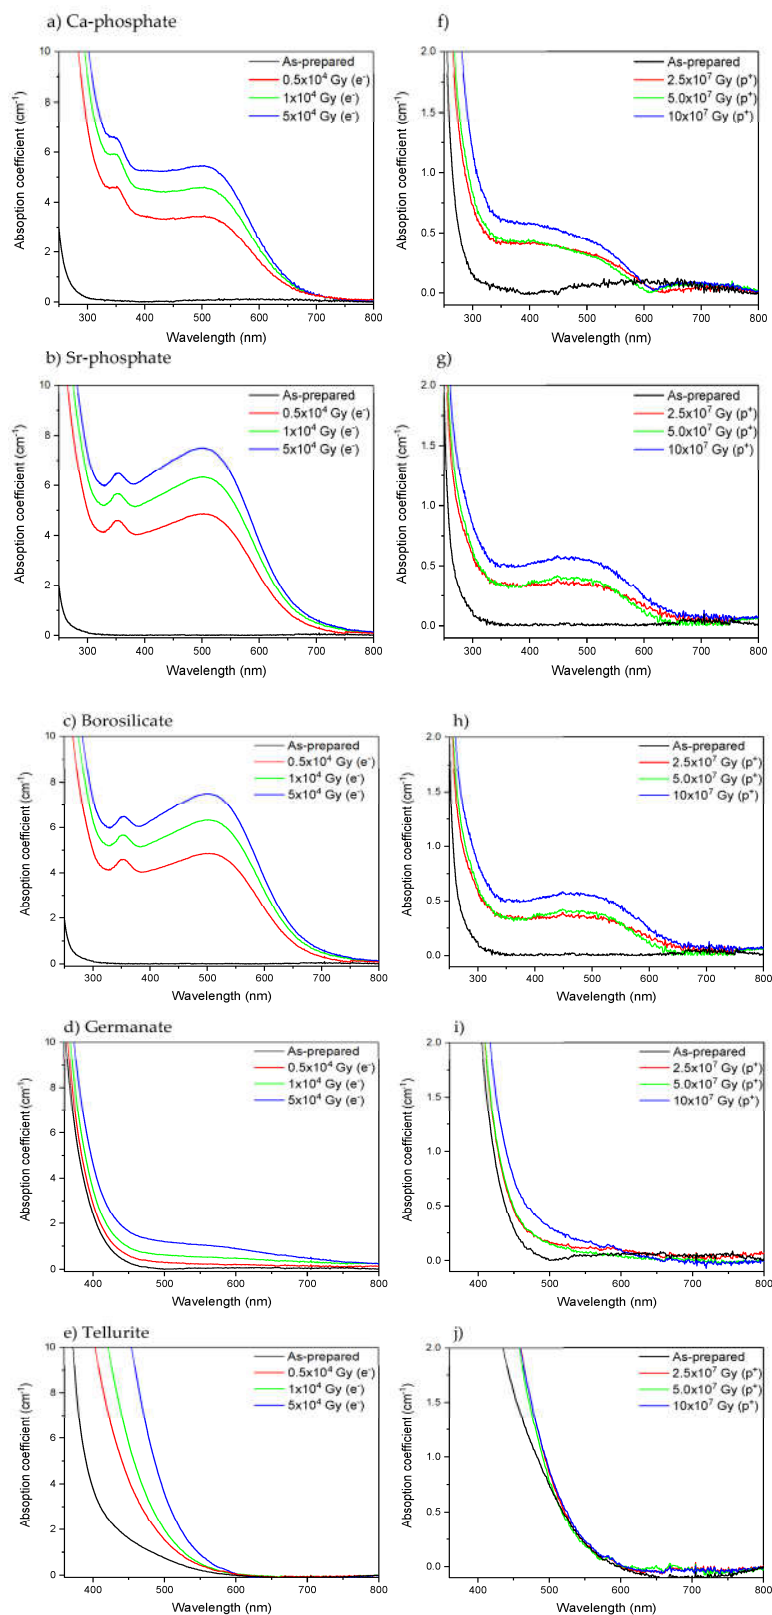

**Figure S1.** Absorption spectrum before and after irradiation treatment with electrons (a-e) and proton (f-j) irradiated Ca-phosphate, Sr-phosphate, borosilicate, germanate, and tellurite glasses respectively.
